# Supplementary material for: CSF-1 Receptor-Dependent Colon Development, Homeostasis and Inflammatory Stress Response
Source: PubMed Central journal article supplement (PMC3579891; doi:10.1371/journal.pone.0056951), 2013-02-22

# Supplementary Figure 3

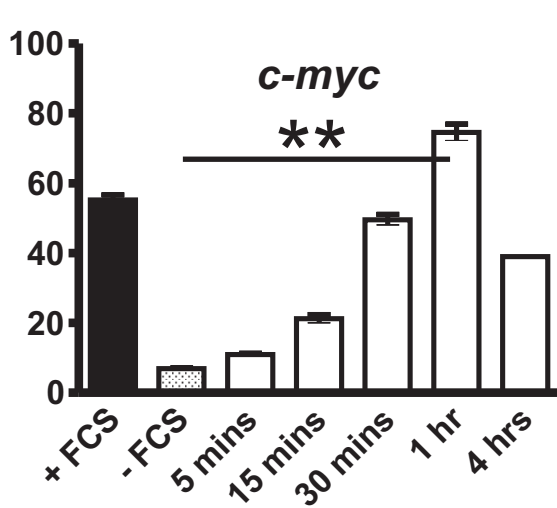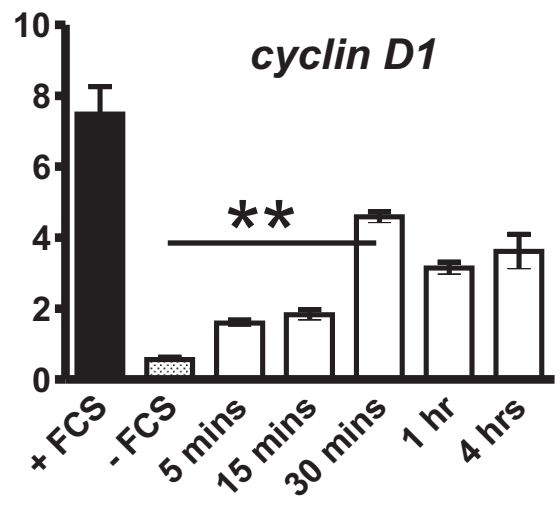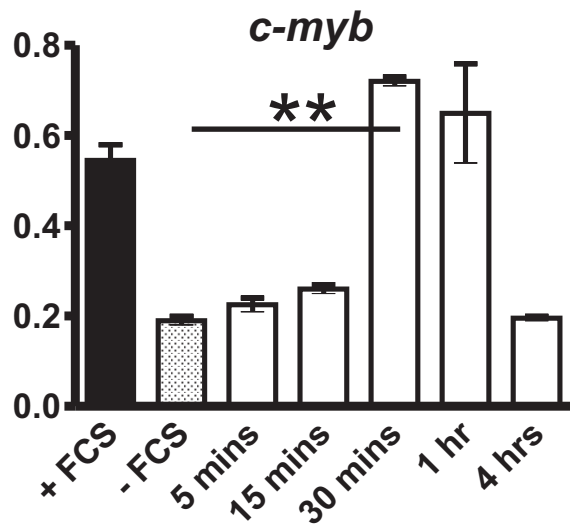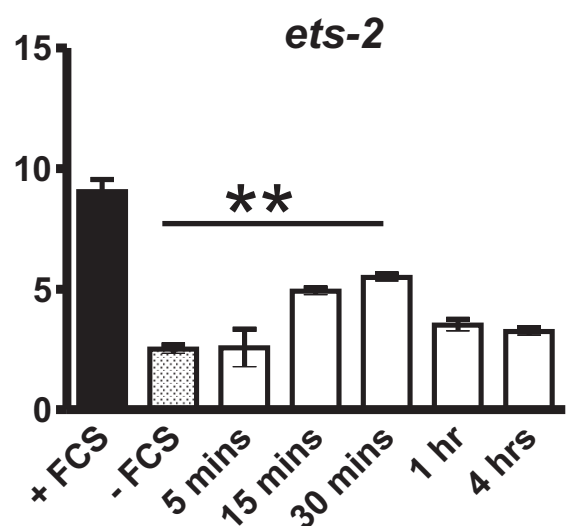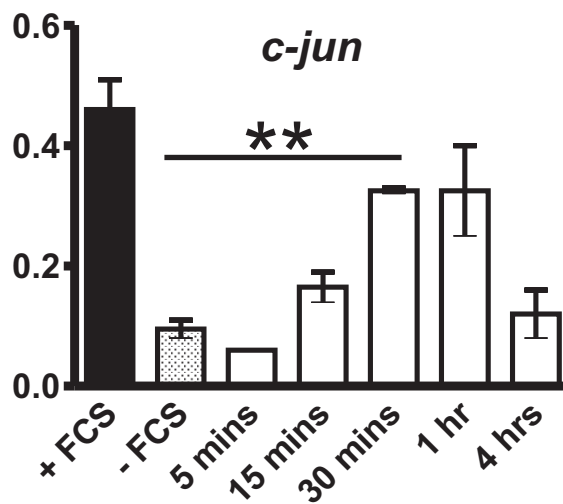

Supplement: pone.0056951.s003.pdf [file pone.0056951.s003.pdf]
