# Supplementary material for: CSF-1 Receptor-Dependent Colon Development, Homeostasis and Inflammatory Stress Response
Source: PubMed Central journal article supplement (PMC3579891; doi:10.1371/journal.pone.0056951), 2013-02-22
Supplement: pone.0056951.s004.pdf [file pone.0056951.s004.pdf]

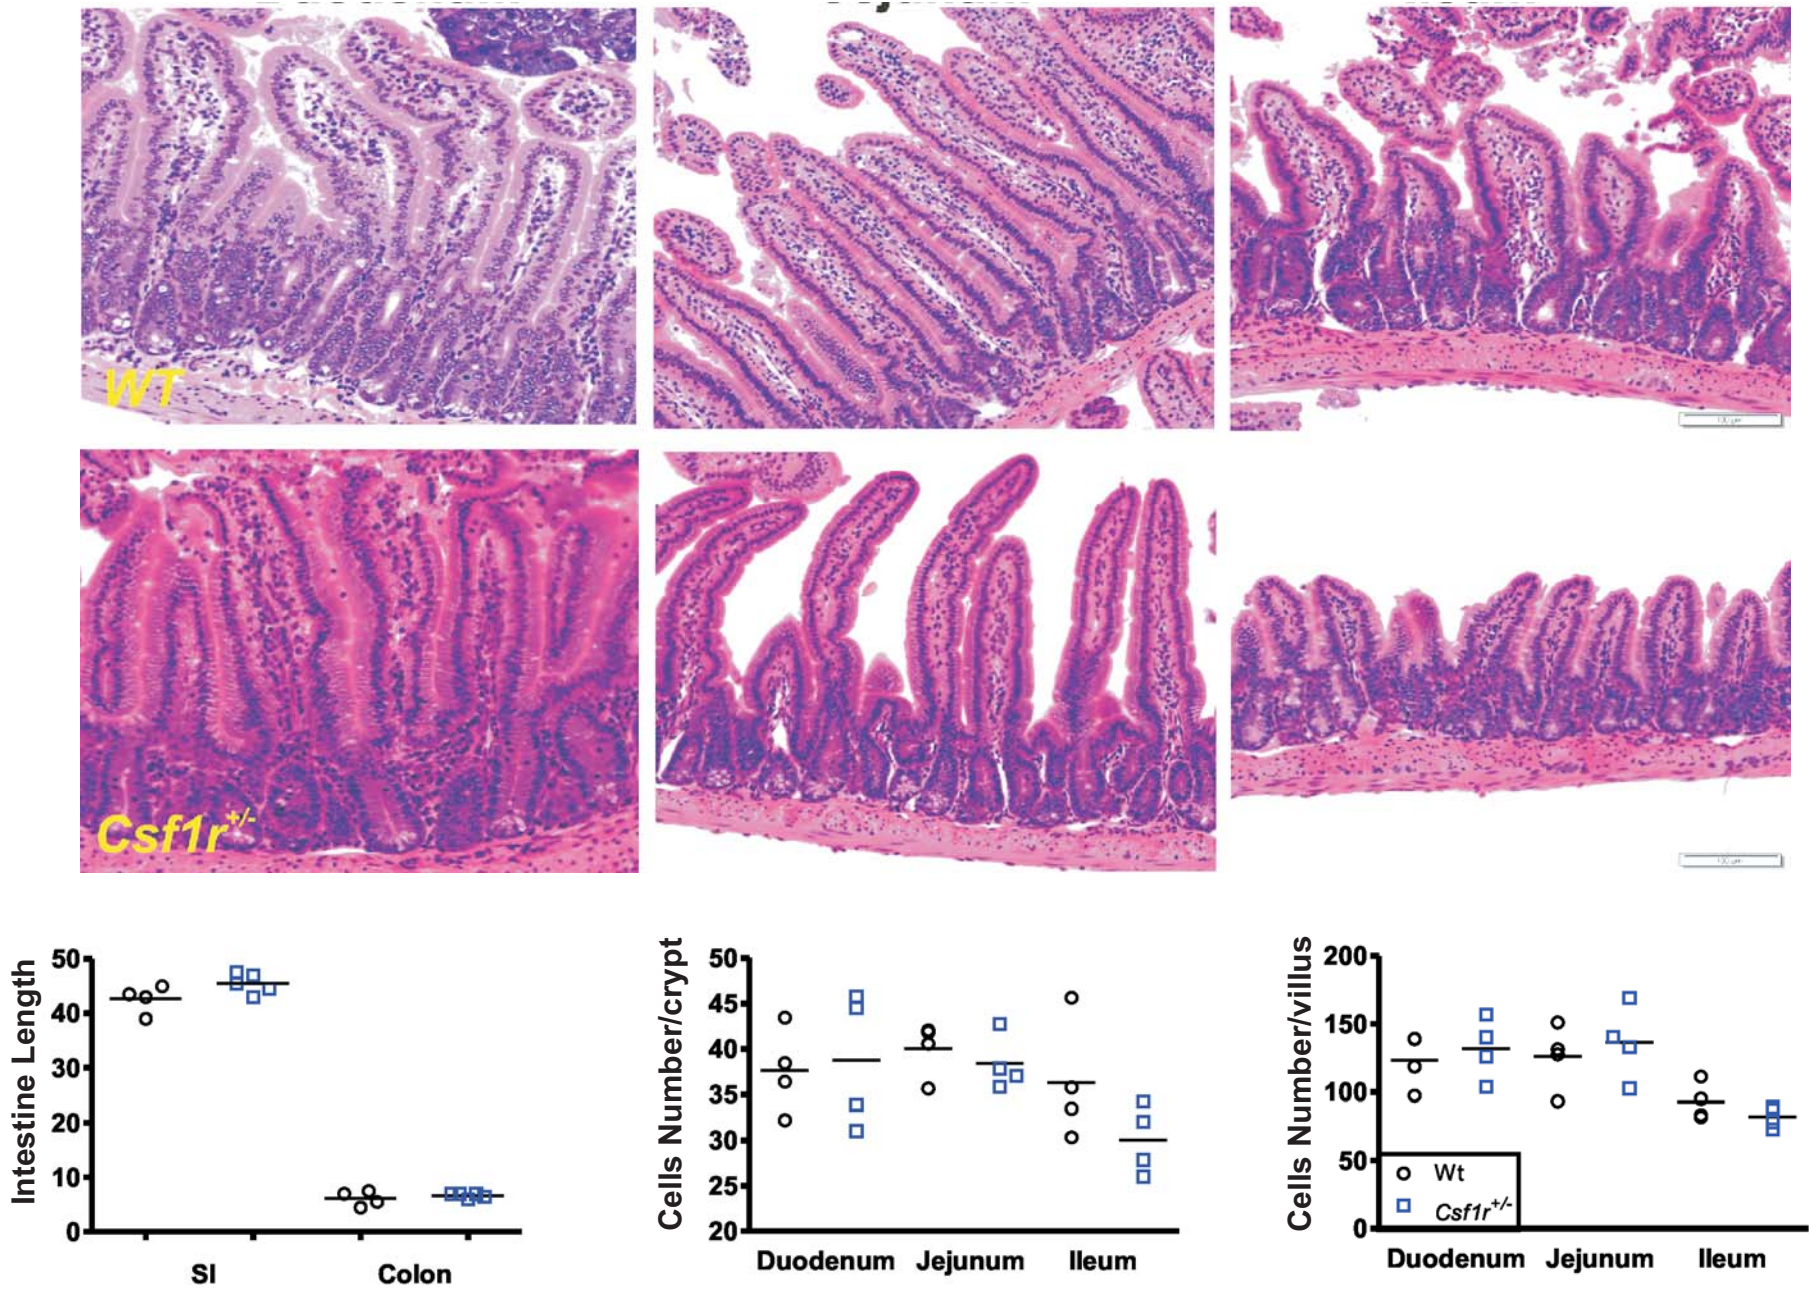

Supplementary Figure 4
